# Supplementary material
Source: PubMed Central journal article supplement (PMC58707)
Supplement: pnas_201268998_6.pdf [file pnas_201268998_6.pdf]

aattccgatgccatctcaccgcggcatcggcggatcgcgcacggagggggtgagcagccgg 60  
cgggagagaaaggagaaggagaaaaaggctaaagcctaaacttctgacatggccacagcc 120  
T S D M A T A  
tcaccaagaactgatacaagtaacaaccataatggaaggttacagatgcaagtaacagtt 180  
S P R T D T S N N H N G R L Q M Q V T V  
tctagtgccaaactgaaacggaagaagaattgggttgaacaactttctacacagaatta 240  
S S A K L K R K K N W F G T T F Y T E L  
actgcagacgggtgaaatcaagaaaacagcaaaatcaagtagttcttcaaattcaaagtgg 300  
T A D G E I K K T A K S S S S S N P K W  
gatgaacagctgacagtgatgtgactccacagactacgctggaatttagagtgtggagc 360  
D E Q L T V N V T P Q T T L E F R V W S  
catcacactttaaaagcagatgctttattaggaagagccactgtagacttgagacaagct 420  
H H T L K A D A L L G R A T V D L R Q A  
ttggaaatacacaatagaaaattggacaagggtgaaagaacagttgaaattatcattggaa 480  
L E I H N R K L D K V K E Q L K L S L E  
aacaagagtggtgcatggtgcaaacaggcgaactgacagttgtgctagatggcttgggtgt 540  
N K S G M V Q T G E L T V V L D G L V V  
gaacaagaatctcttacaatctcagttcaccagcaaccaaaagttcagcaaaatggagag 600  
E Q E S L T N L S S P A T K V Q Q N G E  
gctgtgcatgaaaacagagatgcttcggcaagaagtagatcaagatctgcttggatggt 660  
A V H E N R D A S A R S T S R S A C D V  
tctaattgggaatgacaatcaagtagcttcaaactctgtagtagacagaatgcattctgcata 720  
S N G N D N Q V P S N S V V Q N A F C I  
gaagctgttaatggaaacaactcaccatctcctacacatattgcagccagaccacaaaat 780  
E A V N G N N S P S P T H I A A R P K N  
acactgtacaaaaccacttggagctgagcttgcacagcactgttaatgggtgagaca 840  
T P V P K P L G A E L V N S T V N G E T  
tcttctctgcaccagaaactggtaattcttctgtctctgaagctatggtaggttcagaa 900  
S S S A P E T G N S S V S E A M V G S E  
gaagctcccattgtctacagattgcactaacactacagcagaacctcaatcaacagaagaa 960  
E A P M S T D C T N T T A E P Q S T E E  
gcagctagttgttctgaaagccacacttctgcactatctgttgcgctccgctggactagaa 1020  
A A S C S E S H T S A L S V A S A G L E  
gcttcaactactacagactgtgctcagcctaataaccagtagcagcagatgcagcaaaa 1080  
A S T T T D C A Q P N T S T A A D A A K  
ccaagggaaatcctcctcagcctcaagtgcatcaggagatcctgtaagacagcagactgtt 1140  
P R E S S S A S S A S G D P V R Q T V  
aatgctggtagacagaactttaccaccaggggtgggcaagaaaggatcctcatggtaga 1200  
N A G T E P L P P G W E Q R K D P H G R  
acctattatggtgatcacaatacacgaactacaacgtgggaaagaccacagcccttgct 1260  
T Y Y V D H N T R T T T W E R P Q P L P  
cctggctgggaaagaagagttgatgatcgtggaagagttactatgtggaccataacacc 1320  
P G W E R R V D D R G R V Y Y V D H N T  
agaacaacaacatggcagcgaccaacaatggaatcagtcaggaactttgagcagtgaggag 1380  
R T T T W Q R P T M E S V R N F E Q W Q  
tctcagcgtaatcaactgcagggagctatgcaacaatttaaccaacgatacctctattcg 1440  
S Q R N Q L Q G A M Q Q F N Q R Y L Y S  
gcttcgatgttgtcagcagagaacgatccacttgggcctttgccaccaggggtgggaaagg 1500  
A S M L S A E N D P L G P L P P G W E R  
agagtgattcaaatgatagggtgattttgtaaatcataacacaaagacaacacaatgg 1560  
R V D S N D R V Y F V N H N T K T T Q W  
gaagaccctcgaacccaaggtttacaaaatgaggaccctcttccagaggggtgggaaatc 1620  
E D P R T Q G L Q N E D P L P E G W E I  
agatacactagagaaggtgtacgatactttgttgatcataatacaagaactaccaccttc 1680  
R Y T R E G V R Y F V D H N T R T T T F  
aatgatcctcgtactgggaagtcttctgtaataaaggccacagattgcctatgagcgt 1740  
N D P R T G K S S V N K G P Q I A Y E R  
agcttttaggtggaaacttgctcatttccggttacttgtgtcagtccaatgcaccg 1794  
S F R W K L A H F R Y L C Q S N A P
