# Supplementary material
Source: PubMed Central journal article supplement (PMC58707)
Supplement: pnas_201268998_8.pdf [file pnas_201268998_8.pdf]

1 TSDMATASPRTDTSNNHNGRLQMQVTVSSAKLK-RKKNWFGTTFYTELTADGEIKKTAKS clone 2  
1 MGSLTMKS-----QLQITVISAALKKENKKNWFGPSPYVEVTVDQSKKTEKC mouse PUL  
1 TNHVP TST-----LVQNSC-----CSYV---VNGDNTSPSSPS human WWP1

60 SSSSNPKWDEQLTVNVTPQTTLLEFRVWSHHTLKADALLGRATVDLRQALEIHNRKLDKVK clone 2  
49 NNTNSPKWKQPLTVIVTPTSKLCFRVWSHQTLKSDVLLGTAGLDIYETLKSNNMKLEFVV mouse PUL  
30 QVAARPKNTPAPKPLASEPA-----DDTVNGES-----SSFAPTDNASVTGTPVV human WWP1

120 EQLKLSLENKSGMVQTGELTVVLDGLVVEQESLTNLSSP-ATKVQONGEAVHENRDASAR clone 2  
109 MTLQL-VGDKPETETMGDLSVCLDGLQVEAEVVTNGETSCSESTTONDDGCRTRDDTRVS mouse PUL  
75 SEENA-LSPNCTSTTVEDPPV-----QEILTSSE-----NNECIPSTSAELE human WWP1

179 STSRSAACDVSNGNDNQVPSNSVQNAFCIEAVNGNNSPSPTHIAARPKNTPVPKPLGAEL clone 2  
168 TNGSEDPEVAASGENKRA-----NGNNSPSSLNNGGFKPSRPPRPSRPPPT mouse PUL  
116 SEARSILEPDTNSR-----SSAFEAAKSRQPD----- human WWP1

239 VNSTVNGETSSAPETGNSVSEAMVGSEEPMSDCTNTTAEPPQSTEEAASCSESH TSA clone 2  
214 PRRPASVNGSPSTNSDSGSLSTGSL-----PPTNTNVNTSTSEGATSG mouse PUL  
145 -----GCM-----DPVRQQSGNANET----- human WWP1

299 LSVASAGLEASTTTDCAQPNTSTAADAAPRESSSASSASGDPVRQQTVNAGTEPLPPGW clone 2  
257 LII-----PLTISGGSGRPLNTVLSQA-----PLPPGW mouse PUL  
162 -----LPSGW human WWP1

359 EQRKDPHGRTYYYVDHNTRTTTWERPQPLPPGWERRVDDRGRVYYVDHNTRTTTWQRPTME clone 2  
285 EQRVDQHGRVYYVDHVEKRTTWDREPLPPGWERRVDNMGRVYYVDHFTRTTTWQRPTLE mouse PUL  
167 EQRKDPHGRTYYYVDHNTRTTTWERPQPLPPGWERRVDDRGRVYYVDHNTRTTTWQRPTME human WWP1  
WW domain WW domain

419 SVRNFEQWQSQRNQLQGAMQQFNQRYLYSASMLSAEN-----DPLGPLPP-WERRVDSND clone 2  
345 SVRNFEQWQLQRSQLOGAMQQFNQRFIYGNQDLFATSQNKEDPLGPLPPGWEKRTDSNG mouse PUL  
227 SVRNFEQWQSQRNQLQGAMQQFNQRYLYSASMLAEN-----DPYGPLPPGWEKRVSDTD human WWP1

473 RYFVNHNHTKTQWEDPRTOGLQNE DPLPEGWEIRYTRREGVRYFVDHNTRTTTFNDPRTG clone 1  
405 RYFVNHNTRITQWEDPRSQQQLNEKPLPEGWEMRFTVDGIPYFVDHNRRATTYIDPRTG mouse PUL  
282 RYFVNHNHTKTQWEDPRTOGLQNEEPLPEGWEIRYTRREGVRYFVDHNTRTTTFKDPRTG human WWP1  
WW domain WW domain

533 KSSVNKG-PQIAYERSFRWKLAFRYLCQSNAP clone 2  
465 KSALDNG-PQIAYVRDFKAKVQYFRFWCQQLAMPQHIKITVTRKTLFEDSFQQIMSFSPQ mouse PUL  
342 KSSVTKGGPQIAYERGFRWKLAFRYLCQSNALP SHVKINVSROTLFEDSFQQIMALKPY human WWP1

525 DLRRRLWVIFPGEGLDYGGVAREWFFLLSHEVLNPMYCLFEYAGKDNVYCLQINPASYIN mouse PUL  
402 DLRRRLYVIFRGEGLDYGGLAREWFFLLSHEVLNPMYCLFEYAGKNVYCLQINPASTIN human WWP1  
Putative E2-bindng domain

585 PDHLKYFRFIGRFIAMALFHGKFIDTGFSLPFYKRIILNKPVGLKDLESIDPEFYNSLIWV mouse PUL  
462 PDHLSYFCFIGRFIAMALFHGKFIDTGFSLPFYKRMLSKKLTIKDLESIDTEFYNSLIWI human WWP1

645 KENNIEECGLEMYFSVDKEILGEIKSHDLKPNNGNILVTEENKEEYIRMVAEWRLSRGVE mouse PUL  
522 RDNNIEECGLEMYFSVDEILGKVTSHDLKLGGSNILVTEENKDEYIGLMTIEWRFSRGVQ human WWP1

705 EQTQAFFEGFNEILPQQYLQYFDAKELEVLLCGMQEIDLNDWQRHAIYRHYTRTSKQIMW mouse PUL  
582 EQTKAFLDGFNEVPLQWLQYFDEKELEVMLCGMQEVDLADWQRNTVYRHYTRNSKQIWI human WWP1

765 FWQFVKEIDNEKRMRLLOFVTGTCLRPVGGFADLMGSNGPQKFCIEKVGKENWLP RSHTC mouse PUL  
642 FWQFVKETDNEVRMRLLOFVTGTCLRPVGGFAELMGSNGPRNS human WWP1  
HECT domain

825 FNRLDLPPYKSYEQKELLLFAIEETEGFGQE mouse PUL
