# Supplementary material
Source: PubMed Central journal article supplement (PMC58707)
Supplement: pnas_201268998_9.pdf [file pnas_201268998_9.pdf]

|     |                                                               |               |
|-----|---------------------------------------------------------------|---------------|
| 1   | -----RRA-----EEEEESRILRVKVVSG-----                            | clone 1       |
| 1   | PGGWLRRALPGRERLQSPVHAVPPQHGTSHSRLVTPGAGRDQDFSSPPLLLLGETDHL    | hKIAA0439     |
| 1   | MAA-----EPIYGLS--EDDEESRILRVKIVSG-----                        | xNEDD4        |
| 20  | -IDLA-----KKDIF--GASDPYVKLSLYVADENRELALVQTKTIKKTLNPKWNEEFYF   | clone 1       |
| 61  | HLDLPLSPLPTSDELFLPGICDPYVKLSLYVADENRELALVQTKTIKKTLNPKWNEEFYF  | hKIAA0439     |
| 30  | -TDLA-----KKDIF--GASDPYVKLSLYVADENRELALVQTKTIKKTLNPKWNEEFF    | xNEDD4        |
|     | C2 domain                                                     |               |
| 71  | RVNPTNHRLLEFVFDENRLTRDDFLGQVDVPLSHLPTEDPSMERPYTFKDFLLRPRSHKS  | clone 1       |
| 121 | RVNPSNHRLLEFVFDENRLTRDDFLGQVDVPLSHLPTEDPTMERPYTFKDFLLRPRSHKS  | hKIAA0439     |
| 78  | RVHPTNHRLLEFVFDENRLTRDDFLGQVDVPLNHLPTEDPTMERPYTFKDFLLRPRSHKS  | xNEDD4        |
| 131 | RVKGFLRLKMAYPKNGGQEEENSQDRDESEHGWDVVDSSDSASQRQEELPPPPLPPGWE   | clone 1       |
| 181 | RVKGFLRLKMAYPKNGGQDEENSQDRDDMEHGWEVVDSSNDSSASQHQEELPPPPLPPGWE | hKIAA0439     |
| 138 | RVKGFLRLKMAYLPKNGMQEEETNEQRESEQAWDVVDSSSPHQQELPAPMPPPGWE      | xNEDD4        |
| 191 | EKVDNLGRYYVNHNNRRTTQWHRPSLIDVGSDDNNIRQINHEAAHRRFRSRRHISEDLE   | clone 1       |
| 241 | EKVDNLGRYYVNHNNRRTTQWHRPSLMDVSSDNNIRQINQEAHRRFRSRRHISEDLE     | hKIAA0439     |
| 198 | EKVDNLGRYYVNHNNKSTOWQRPSLIDVASEDNNIRYIQEA-HRVFRSRRHISEDLE     | xNEDD4        |
|     | WW domain                                                     |               |
| 251 | PEPLET-GDIPEPWEAISEEASATGDTLSLSLPPPPASPVSRSSPQELSEELSRRLQITP  | clone 1       |
| 301 | PEPSEG-GDVPEPWETISEEVNIAGDSLGLALPPPPASPGSRTSPQELSEELSRRLQITP  | hKIAA0439     |
| 257 | PEHLEGVGDMPEPWETISEEMTLTADTLNQLSLPPP-ASPDSRATAMELSEELNRRQLISS | xNEDD4        |
| 310 | DSNGEQLSSLIQRDPSSRLRSCSVTDTVAEQSQLSLPS-----VA                 | clone 1       |
| 360 | DSNGEQFSSLIQREPSSRLRSCSVTDAVAEQGHLPPPS-----VA                 | hKIAA0439     |
| 317 | DSNGEQFSSIIQREPSTRLRSCSVTDGVPEQAHLSLPSTSTGRARSSTVTGGEDSTPTVA  | xNEDD4        |
| 350 | YVHTTPGLPSGWEERKDAKGRYYVNHNNRRTTTWTRPIMQLAEDGMVGSAAANNHNLSEP  | clone 1       |
| 400 | YVHTTPGLPSGWEERKDAKGRYYVNHNNRRTTTWTRPIMQLAEDGASGSATNSNHLIEP   | hKIAA0439     |
| 377 | YVHTTPGLPSGWEERKDAKGRYYVNHNNRRTTTWTRPIVQHAEDGAVGSTSNSSNHLSEP  | xNEDD4        |
|     | WW domain                                                     |               |
| 410 | QIRRPRLSSPTVTLSAPLEGMKDSPVRRAVKDTLSNPQSPQSPYNSPKPQHKVAQSFL    | clone 1       |
| 460 | QIRRPRLSSPTVTLSAPLEGAKDSPVRRAVKDTLSNPQSPQSPYNSPKPQHKVTQSFL    | hKIAA0439     |
| 437 | QIRRPRLSSPTVTLSAPLEGTKDFPVRRAVKDTLSNPQSPQSPYNSPKPQHKGAQSFL    | xNEDD4        |
| 470 | PPGWEMRIAPNGRPFFIDHNTKTTTWEDPRLKFPVHLRRTKASLNPNDLGPLPPGWEERIH | clone 1       |
| 520 | PPGWEMRIAPNGRPFFIDHNTKTTTWEDPRLKFPVHMRSKTSLNPNDLGPLPPGWEERIH  | hKIAA0439     |
| 497 | PPGWEMRIAPNGRPFFIDHNTKTTTWEDPRLKFPVHMRTKASLNPNDLGPLPPGWEERIH  | xNEDD4        |
|     | WW domain                                                     |               |
| 530 | LDGRTFYIDHNNKITQWEDPRLQNPAITGPAVPYSREFKQKR                    | clone 1       |
| 580 | LDGRTFYIDHNSKITQWEDPRLQNPAITGPAVPYSREFKQKYDYFRKKLKKPADIPNRF   | hKIAA0439     |
| 557 | MDGRTFYIDHNTKITQWEDPRLQNPAITGPAVPYSREFKQKYDYFRKKLKKPADIPNRF   | xNEDD4        |
|     | WW domain                                                     |               |
| 640 | MKLRNNIFEESYRRIMSVKRPDVLKARLWIEFESEKGLDYGGVAREWFFLLSKEMFNPY   | hKIAA0439     |
| 617 | MKLRNNIFEESYRRIMSVKRPDVLKARLWIEFESEKGLDYGGVAREWFFLLSKEMFNPY   | xNEDD4        |
| 700 | YGLFEYSATDNYTLQINPNSGLCNEDHLSYFTFIGRVAGLAVFHGKLLDGFFIRPFYKMM  | hKIAA0439     |
| 677 | YGLFEYSATDNYTLQINPNSGLCNEDHLSYFTFIGRIAGLAVFHGKLLDGFFIRPFYKMM  | xNEDD4        |
|     | Putative E2-binding domain                                    |               |
| 760 | LGKQITLNDMESVDSEYYNSLKWILENDPTELDLMFCIDEENFGQTYQVDLKPNGSEIMV  | hKIAA0439     |
| 737 | LGKQITLNDMESVDSEYYNSLKWILENDPTELDLMFCIDEENFGQTYQVDLKPNGSEIMV  | xNEDD4        |
| 820 | TNENKREYIDLVIQWRVFNVRVQKQMNAFLEGFTELLPIDLIKIFDENELELLMCGLDVD  | hKIAA0439     |
| 797 | TNDNKREYIDLVIQWRVFNVRVQKQMNAFLEGFTELLIAIDLKIFDENELELLMCGLDVD  | xNEDD4        |
| 888 | VNDWRQHSIYKNGYCPNHPVIQVFWKAVLLMDAEKRIRLLQFVTGTSRVPMNGFAELYGS  | hKIAA0439     |
| 857 | VNDWRQHTLYKNGYCPNHPAVQVFWKAVLLMDAEKRIRLLQFVTGTSRVPMNGFAELYGS  | xNEDD4        |
|     | HECT domain                                                   |               |
|     | *                                                             |               |
| 894 | NGPQLFTIEQWGSPEKLPRAHTCFNRLDLPPYETFEDLREKLLMAVENAQGFEGVD      | 980 hKIAA0439 |
| 917 | NGPQLFTIEQWGSPEKLPRAHTCFNRLDLPPYDSFEDLREKLLMAVENAQGFEGVD      | 956 xNEDD4    |
|     | *                                                             |               |
